# Supplementary material for: Feature-by-Feature – Evaluating De Novo Sequence Assembly
Source: PubMed Central journal article supplement (PMC3272011; doi:10.1371/journal.pone.0031002), 2012-02-03
Supplement: pone.0031002.s001.pdf [file pone.0031002.s001.pdf]

# Feature Analysis to Evaluate *De novo* Sequence Assembly (Supplemental Material)

Francesco Vezzi, Giuseppe Narzisi, Bud Mishra

August 5, 2011

## 1 Datasets

### 1.1 Real Long Read Dataset

Description of the real long read dataset. All the genome projects have been downloaded from <ftp://ftp.ncbi.nih.gov/pub/TraceDB/>. For each project we downloaded the fasta files, the quality files and the ancillary data (read trimming, paired reads constraints, etc.).

| Sample | Genome                     | Length  | # reads | Avg length | tot length | coverage |
|--------|----------------------------|---------|---------|------------|------------|----------|
| 1      | Alcanivorax                | 3789834 | 39044   | 1080       | 42177431   | 11.13    |
| 2      | Alteromonas macleodii      | 4448980 | 43878   | 1007       | 44209050   | 9.94     |
| 3      | Bacillus anthracis         | 5227293 | 125879  | 854        | 107563457  | 20.58    |
| 4      | Bacillus cereus            | 5269030 | 68503   | 1071       | 73375574   | 13.93    |
| 5      | Bifidobacterium dentium    | 2636367 | 28240   | 757        | 21394408   | 8.12     |
| 6      | Bordetella bronchiseptica  | 5339179 | 55895   | 946        | 52909812   | 9.91     |
| 7      | Bradyrhizobium             | 8264687 | 89675   | 1018       | 91346484   | 11.05    |
| 8      | Brucella Suis              | 3315173 | 36275   | 895        | 32499069   | 9.8      |
| 9      | Burkholderia mallei        | 5742303 | 101634  | 1008       | 102506338  | 17.85    |
| 10     | Candidatus korarchaeum     | 1590757 | 30168   | 1048       | 31625328   | 19.88    |
| 11     | Escherichia coli           | 5572075 | 58534   | 1119       | 65538509   | 11.76    |
| 12     | Lactobacillus gasseri      | 2011295 | 42477   | 882        | 37495317   | 18.64    |
| 13     | Mesoplasma florum          | 793224  | 86566   | 788        | 68278119   | 86.08    |
| 14     | Shewanella oneidensis      | 4969803 | 69499   | 752        | 52307472   | 10.53    |
| 15     | Staphylococcus apidermidis | 2616530 | 57997   | 900        | 52208201   | 19.95    |
| 16     | Staphylococcus aureus      | 2809421 | 50035   | 818        | 40937267   | 14.57    |
| 17     | Thioalkalivibrio           | 3464554 | 28458   | 940        | 26766873   | 7.73     |
| 18     | Vibrio cholerae b33        | 4154698 | 30570   | 1075       | 32865241   | 7.91     |
| 19     | West Nile virus            | 11029   | 3148    | 937        | 2952302    | 267.69   |
| 20     | Wolbachia sp               | 1267782 | 26816   | 981        | 26332465   | 20.77    |
| 21     | Yersinia pestis biovar     | 4681648 | 73065   | 989        | 72291428   | 15.44    |

The datasets have been assembled using CABOG, MINIMUS, PCAP, SUTTA, TIGR that require different input formats. In order to produce the input files for the assemblers we implemented the following pipeline:

- with `tarchive2ca` we converted the downloaded project into CABOG input format (*frg* file);
- with `toAmos` we converted the *frg* into an *afg* that can be handled by SUTTA and MINIMUS;
- with `frg2ta` we converted the *frg* into TIGR input format;
- with a script we converted the TIGR format into a PCAP like input format;

## 1.2 Real Short Read Datasets

The four real short read datasets have been downloaded from the Short Read Archive website.

|   | Name                               | SRA       | Length  | # reads  | Avg length | coverage | ins length |
|---|------------------------------------|-----------|---------|----------|------------|----------|------------|
| 1 | <i>Escherichia coli</i>            | SRX000429 | 4639675 | 20816447 | 36         | 161.52   | 200        |
| 2 | <i>Chlamydia trachomatis</i>       | ERX012723 | 1042579 | 8100845  | 54         | 419.58   | 243        |
| 3 | <i>Staphylococcus aureus</i> ST239 | ERX012594 | 2906507 | 5307429  | 75.73      | 138.29   | 268        |
| 4 | <i>Yersinia pestis</i> KIM         | SRX048908 | 4600755 | 2311795  | 100        | 50.25    | 300        |

In order to produce a number of assemblies able to perform the statistical analysis we assembled the following different coverages:

- *Escherichia coli*: 30×, 50×, 70×, 90×, 110×, 130× and, 160×;
- *Chlamydia trachomatis*: 30×, 50×, 70×, 90×, 110×, 130×;
- *Staphylococcus aureus*: 30×, 50×, 70×, 90×, 110×, 130×;
- *Yersinia pestis*: 30× and 50×;

We assembled *E.coli* and *Chlamydia* datasets with ABySS, Ray, SUTTA, SOAP and Velvet, while *Staphylococcus* and *Yersinia* datasets have been assembled using only ABySS, Ray, SOAP and Velvet.

## 1.3 Simulated Datasets

The reference sequences used to generate the simulated datasets have been downloaded from <http://www.ncbi.nlm.nih.gov/genome>

|    | Name                                  | Length  | Long Reads  |          | Short Reads |          |
|----|---------------------------------------|---------|-------------|----------|-------------|----------|
|    |                                       |         | read length | coverage | read length | coverage |
| 1  | <i>Alcanivorax borkumensis</i>        | 3120143 | 800         | 12       | 100         | 80       |
| 2  | <i>Alteromonas macleodii</i>          | 4448980 | 800         | 12       | 100         | 80       |
| 3  | <i>Bacillus amyloliquefaciens</i>     | 3918589 | 800         | 12       | 100         | 80       |
| 4  | <i>Bacillus cereus</i>                | 5269030 | 800         | 12       | 100         | 80       |
| 5  | <i>Bordetella bronchiseptica</i>      | 5339179 | 800         | 12       | 100         | 80       |
| 6  | <i>Brucella suis</i>                  | 3315173 | 800         | 12       | 100         | 80       |
| 7  | <i>Burkholderia mallei</i> NCTC       | 5742303 | 800         | 12       | 100         | 80       |
| 8  | <i>Campylobacter jejuni</i>           | 1777831 | 800         | 12       | 100         | 80       |
| 9  | <i>Chlamydia trachomatis</i>          | 1038842 | 800         | 12       | 100         | 80       |
| 10 | <i>Chlorobium tepidum</i>             | 2154946 | 800         | 12       | 100         | 80       |
| 11 | <i>Dehalococcoides</i>                | 1413462 | 800         | 12       | 100         | 80       |
| 12 | <i>Geobacter metallireducens</i>      | 3997420 | 800         | 12       | 100         | 80       |
| 13 | <i>Mesoplasma florum</i>              | 793224  | 800         | 12       | 100         | 80       |
| 14 | <i>Shewanella oneidensis</i>          | 5131416 | 800         | 12       | 100         | 80       |
| 15 | <i>Staphylococcus aureus</i> COL      | 2813862 | 800         | 12       | 100         | 80       |
| 16 | <i>Staphylococcus aureus</i> JHI      | 2906507 | 800         | 12       | 100         | 80       |
| 17 | <i>Staphylococcus epidermidis</i>     | 2643840 | 800         | 12       | 100         | 80       |
| 18 | <i>Thioalkalivibrio sulfidophilus</i> | 3464554 | 800         | 12       | 100         | 80       |
| 19 | <i>Wolbachia</i>                      | 1267782 | 800         | 12       | 100         | 80       |
| 20 | <i>Yersinia pestis</i>                | 4600755 | 800         | 12       | 100         | 80       |

In order to simulate long reads we used MetaSim software. In particular we used the following command line:

```
MetaSim cmd -r NUM_READS -f INS -t VAR --sanger
--sanger-mean LENGTH --sanger-param2 0 REFERENCE
```

where NUM\_READS was set to the number of reads required to achieve the desired coverage. For each sequence we produce a 10× coverage composed by reads of length 800 with insert size of 3000 bp and a standard variation of 500 bp, and a 2× coverage composed by reads of length 800 with insert size of 10000 bp and a standard variation of 2000 bp.

For what concerns the short read simulations we used SimSeq, the read generator used for Assemblathon 1 ([www.assemblathon.org](http://www.assemblathon.org)), to produce an  $80\times$  coverage formed by paired reads of length 100 bp and insert size of 600 bp:

```
java -jar -Xmx2048m SimSeq.jar -1 100 -2 100 --error ERR1 --error2 ERR2
--insert_size 600 --insert_stdev 100 --read_number PAIRS
--reference REFERENCE -o OUTPUT --read_prefix read
```

where ERR1 and ERR2 are the precomputed errors models for the first and the second read.
